# Supplementary material
Source: publisher figshare collection journal article supplement (https://frontiersin.figshare.com/ndownloader/files/22737680)
Supplement: Supplementary file [file 22737680]

**Table S2 Antibiotic resistance genes present in the EAEC from DMP**

|         | Trimethoprim         | Aminoglycoside                      | Beta-lactam                   | Phenicol     | Sulphonamide      | Tetracycline  | Macrolide             |
|---------|----------------------|-------------------------------------|-------------------------------|--------------|-------------------|---------------|-----------------------|
| E3V1B   |                      |                                     | <i>blaCTX-M-15</i>            |              | <i>sul1</i>       |               |                       |
| E2V1    |                      |                                     | <i>blaCTX-M-15</i>            |              | <i>sul1</i>       |               |                       |
| E3V1A   | <i>dfrA1</i>         | <i>aadA1</i>                        | <i>blaTEM-1b</i>              | <i>catA1</i> | <i>sul1</i>       | <i>tet(A)</i> | <i>mdf(A)</i>         |
| E3V1C   |                      |                                     |                               |              |                   |               | <i>mdf(A)</i>         |
| E7V1    |                      |                                     | <i>blaCTX-M-15</i>            |              | <i>sul1</i>       |               |                       |
| E8V1    |                      | <i>aadA5</i>                        | <i>blaCTX-M-15, blaTEM-1B</i> |              | <i>sul1</i>       | <i>tet(B)</i> | <i>mdf(A), mph(A)</i> |
| E9V1    | <i>dfrA1</i>         | <i>aadA1</i>                        | <i>blaTEM-1B</i>              | <i>catA1</i> | <i>sul1</i>       | <i>tet(A)</i> | <i>mdf(A)</i>         |
| E10V5A  | <i>dfrA1</i>         | <i>aadA1, aph(3')-lb, aph(6)-ld</i> | <i>blaTEM-1B</i>              |              |                   | <i>tet(B)</i> | <i>mdf(A)</i>         |
| E11V1   | <i>dfrA7</i>         | <i>aph(3')-lb, aph(6)-ld</i>        | <i>blaTEM-1B</i>              |              | <i>sul2</i>       | <i>tet(A)</i> | <i>mdf(A)</i>         |
| E11V5   | <i>dfrA1</i>         | <i>aadA1</i>                        | <i>blaTEM-1B</i>              | <i>catA1</i> | <i>sul1</i>       | <i>tet(A)</i> | <i>mdf(A)</i>         |
| E13V1D  | <i>dfrA8</i>         | <i>aph(3')-lb, aph(6)-ld</i>        | <i>blaTEM-1B</i>              |              | <i>sul2</i>       | <i>tet(B)</i> | <i>mdf(A)</i>         |
| E13V1E  | <i>dfrA7</i>         | <i>aph(3')-lb, aph(6)-ld</i>        | <i>blaTEM-1B</i>              |              | <i>sul2</i>       |               | <i>mdf(A)</i>         |
| E14V1C  | <i>dfrA7</i>         | <i>aph(3')-lb, aph(6)-ld</i>        | <i>blaTEM-1B</i>              | <i>catA1</i> | <i>sul2</i>       | <i>tet(B)</i> | <i>mdf(A)</i>         |
| E14V1D  | <i>dfrA7</i>         | <i>aph(3')-lb, aph(6)-ld</i>        | <i>blaTEM-1B</i>              | <i>catA1</i> | <i>sul2</i>       | <i>tet(A)</i> | <i>mdf(A)</i>         |
| E16V1A  | <i>dfrA7</i>         | <i>aph(3')-lb, aph(6)-ld</i>        | <i>blaTEM-1B</i>              |              | <i>sul2</i>       | <i>tet(A)</i> | <i>mdf(A)</i>         |
| E17V1   | <i>dfrA7</i>         | <i>aph(3')-lb, aph(6)-ld</i>        | <i>blaTEM-1B</i>              |              | <i>sul2</i>       | <i>tet(A)</i> | <i>mdf(A)</i>         |
| E18V1   |                      |                                     |                               |              |                   | <i>tet(B)</i> | <i>mdf(A)</i>         |
| E19V1   |                      | <i>aph(3')-lb, aph(6)-ld</i>        |                               | <i>catA1</i> | <i>sul2</i>       | <i>tet(A)</i> | <i>mdf(A)</i>         |
| E24V5C  |                      |                                     |                               |              |                   | <i>tet(B)</i> | <i>mdf(A)</i>         |
| E25V1B  | <i>dfrA1</i>         | <i>aadA1, aph(3')-lb, aph(6)-ld</i> | <i>blaTEM-1B</i>              | <i>catA1</i> | <i>sul2</i>       |               | <i>mdf(A)</i>         |
| E30V1   |                      |                                     | <i>blaTEM-1B</i>              |              |                   | <i>tet(B)</i> | <i>mdf(A)</i>         |
| E31V1B  | <i>dfrA1</i>         | <i>aadA1, aph(3')-lb, aph(6)-ld</i> |                               |              | <i>sul2</i>       |               | <i>mdf(A)</i>         |
| E32V5   | <i>dfrA1</i>         | <i>aph(6)-ld</i>                    | <i>blaTEM-1B</i>              |              | <i>sul2</i>       | <i>tet(B)</i> | <i>mdf(A)</i>         |
| E37V1   | <i>dfrA7</i>         | <i>aph(3')-lb, aph(6)-ld</i>        | <i>blaTEM-1B</i>              | <i>catA1</i> | <i>sul2</i>       | <i>tet(A)</i> | <i>mdf(A)</i>         |
| K2V1    | <i>dfrA7</i>         | <i>aph(3')-lb, aph(6)-ld</i>        | <i>blaTEM-1B</i>              |              | <i>sul1, sul2</i> | <i>tet(A)</i> | <i>mdf(A)</i>         |
| K4V4    | <i>dfrA7</i>         | <i>aph(3')-lb, aph(6)-ld</i>        | <i>blaTEM-1B</i>              |              | <i>sul2</i>       |               | <i>mdf(A), mph(A)</i> |
| K5V4    | <i>DfrA14</i>        | <i>aph(3')-lb, aph(6)-ld</i>        | <i>blaTEM-1B</i>              |              | <i>sul2</i>       |               | <i>mdf(A), mph(A)</i> |
| K11V5   |                      |                                     |                               |              |                   |               | <i>mdf(A)</i>         |
| K13V4   | <i>dfrA7</i>         | <i>aph(3')-lb, aph(6)ld</i>         | <i>blaTEM-1B</i>              | <i>catA1</i> | <i>sul2</i>       |               | <i>mdf(A)</i>         |
| K18V1   | <i>dfrA14, dfrA7</i> | <i>aph(3')-lb, aph(6)ld</i>         | <i>blaTEM-1B</i>              |              | <i>sul2</i>       | <i>tet(A)</i> | <i>mdf(A)</i>         |
| K21V5   |                      |                                     |                               |              |                   |               | <i>mdf(A)</i>         |
| K22V1   | <i>dfrA7</i>         | <i>aph(3')-lb</i>                   | <i>blaTEM-1B</i>              |              | <i>sul1, sul2</i> | <i>tet(A)</i> | <i>mdf(A)</i>         |
| K24V1   | <i>dfrA7</i>         | <i>aph(3')-lb, aph(6)-ld</i>        | <i>blaTEM-1B</i>              | <i>catA1</i> | <i>sul2</i>       |               | <i>mdf(A)</i>         |
| K26V1   | <i>dfrA8</i>         | <i>aph(3')-lb, aph(6)-ld</i>        | <i>blaTEM-1B</i>              |              | <i>sul2</i>       | <i>tet(B)</i> | <i>mdf(A)</i>         |
| K30V1   | <i>dfrA5</i>         | <i>aph(3')-lb, aph(6)-ld</i>        |                               |              | <i>sul1, sul2</i> | <i>tet(A)</i> | <i>mdf(A)</i>         |
| K38V1   |                      |                                     |                               |              |                   | <i>tet(A)</i> | <i>mdf(A), mph(A)</i> |
| K39V1   |                      |                                     |                               |              |                   | <i>tet(A)</i> | <i>mdf(A), mph(A)</i> |
| K40V1   | <i>dfrA17</i>        | <i>aadA5, aph(3')-lb, aph(6)-ld</i> | <i>blaTEM-1B</i>              | <i>catA1</i> | <i>sul1, sul2</i> |               | <i>mdf(A), mph(A)</i> |
| K41V1   | <i>dfrA7</i>         | <i>aph(3')-lb, aph(6)-ld</i>        | <i>blaTEM-1B</i>              |              | <i>sul, sul2</i>  | <i>tet(A)</i> | <i>mdf(A)</i>         |
| K16V1   | <i>dfrA7</i>         | <i>aph(3')-lb, aph(6)-ld</i>        | <i>blaTEM-1B</i>              |              | <i>sul2</i>       |               | <i>mdf(A)</i>         |
| K31V1   | <i>dfrA14</i>        | <i>aph(6)-ld</i>                    |                               |              | <i>sul2</i>       | <i>tet(A)</i> | <i>mdf(A)</i>         |
| K44V1   | <i>dfrA8</i>         | <i>aph(3')-lb, aph(6)-ld</i>        | <i>blaTEM-1C</i>              |              | <i>sul2</i>       | <i>tet(A)</i> | <i>mdf(A)</i>         |
| K45V1   | <i>dfrA8</i>         | <i>aph(3')-lb, aph(6)-ld</i>        | <i>blaTEM-1C, blaTEM-1B</i>   |              | <i>sul2</i>       | <i>tet(A)</i> | <i>mdf(A)</i>         |
| P73V1   | <i>dfrA8</i>         | <i>StrA, strB</i>                   | <i>blaTEM-1B</i>              |              | <i>sul2</i>       | <i>tet(B)</i> | <i>mdf(A)</i>         |
| P109V1  |                      |                                     |                               |              |                   |               | <i>mdf(A)</i>         |
| P307V4  | <i>dfrA1</i>         | <i>aadA1, strA, strB</i>            |                               |              | <i>sul2</i>       | <i>tet(B)</i> | <i>mdf(A)</i>         |
| P406V1B | <i>dfrA1</i>         | <i>strA, strB, aadA1</i>            |                               |              | <i>sul2</i>       | <i>tet(B)</i> | <i>mdf(A)</i>         |
| P415V1  | <i>dfrA7</i>         | <i>strA, strB</i>                   | <i>blaTEM-1B</i>              | <i>catA1</i> | <i>sul1, sul2</i> | <i>tet(A)</i> | <i>mdf(A)</i>         |
| P433V1  | <i>dfrA7</i>         | <i>strA, strB</i>                   | <i>blaTEM-1B</i>              |              | <i>sul1, sul2</i> | <i>tet(A)</i> | <i>mdf(A)</i>         |
| P677V1  | <i>dfrA8</i>         | <i>strA, strB</i>                   | <i>blaTEM-1B</i>              |              | <i>sul2</i>       |               | <i>mdf(A)</i>         |
